# Supplementary material
Source: Royal Society of Chemistry journal article supplement (doi:10.1039/d6nr00522e)
Supplement: d6nr00522e1.pdf [file d6nr00522e1.pdf]

## Supplementary Information

### Single-atom Cu<sub>1</sub>/ZrO<sub>2</sub> Coupled with SAPO-34 Enhances CO<sub>2</sub> Hydrogenation to Light Olefins

*Linlong Hu<sup>a,b</sup>, Chentao Wang<sup>a</sup>, Huibin Wang<sup>a</sup>, Hua Pan<sup>c</sup>, Mi Yan<sup>d</sup>, Ke Wang<sup>a,b,\*</sup>  
Pengfei Xie<sup>a,b\*</sup>*

<sup>a</sup> Key Laboratory of Biomass Chemical Engineering of Ministry of Education, College of Chemical and Biological Engineering, Zhejiang University, Hangzhou 310058, China

<sup>b</sup> Zhejiang Key Laboratory of Intelligent Manufacturing for Functional Chemicals, Zhejiang University, Hangzhou, 311215, China

<sup>c</sup> Zhejiang international Joint Laboratory on Low-Carbon Pollution Control and Resource utilization, College of Biological and Environmental Engineering, Zhejiang Shuren University, Hangzhou 310015, China

<sup>d</sup> Zhejiang Province Key Laboratory of Advanced Information Materials, School of Materials Science and Engineering, Zhejiang University, Hangzhou 310058, China

\* Corresponding author, email address: [pfxie@zju.edu.cn](mailto:pfxie@zju.edu.cn)

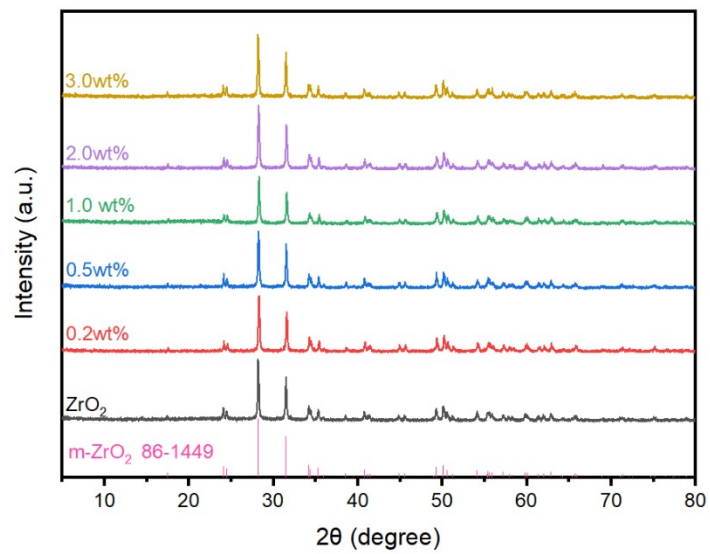

**Fig. S1** XRD patterns of  $\text{Cu}_1/\text{ZrO}_2$  catalysts with different single-atom contents.

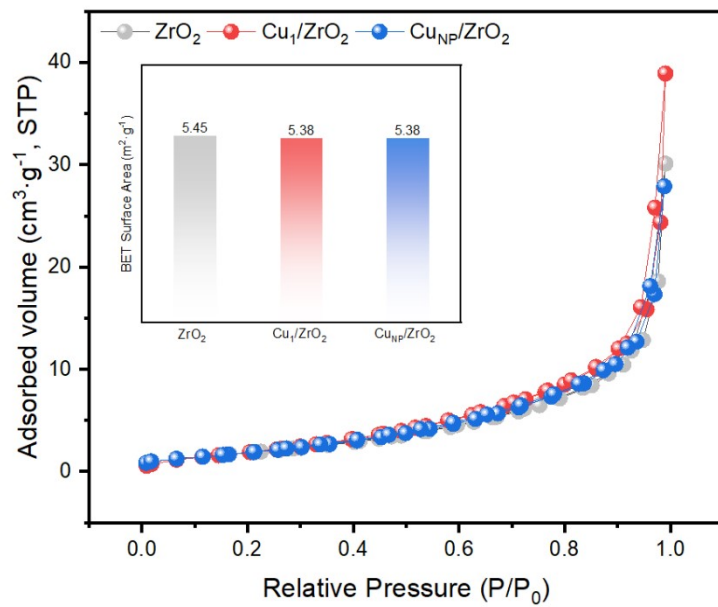

**Fig. S2** N<sub>2</sub> adsorption-desorption isotherms of ZrO<sub>2</sub>, Cu<sub>1</sub>/ZrO<sub>2</sub> and Cu<sub>NP</sub>/ZrO<sub>2</sub> catalysts; the inset shows the corresponding BET specific surface area.

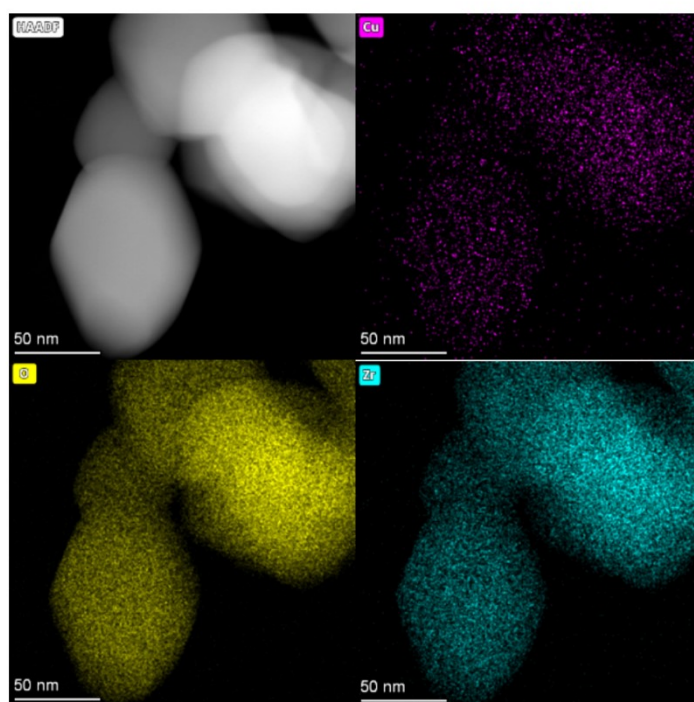

**Fig. S3** Elemental mapping images showing the distribution of Cu, O and Zr in Cu<sub>1</sub>/ZrO<sub>2</sub>.

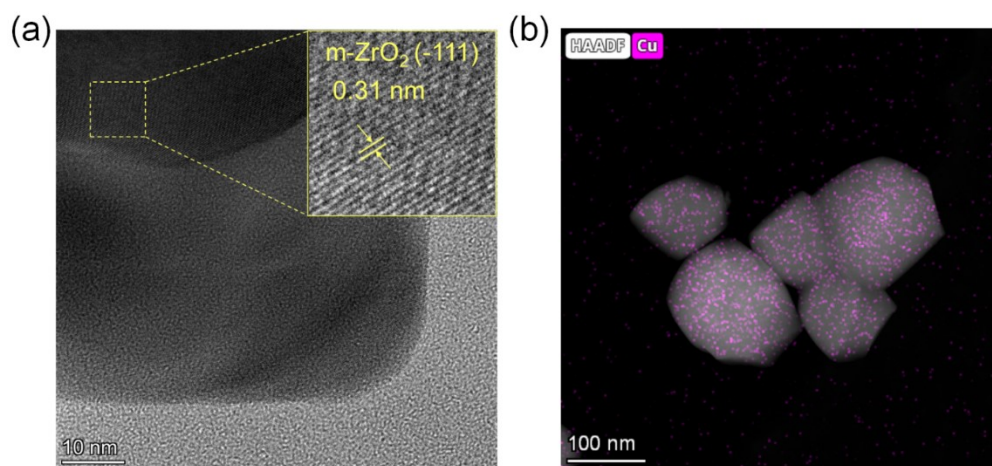

**Fig. S4** HRTEM (a) and Cu EDS mapping (b) of 3.0wt% Cu<sub>1</sub>/ZrO<sub>2</sub>.

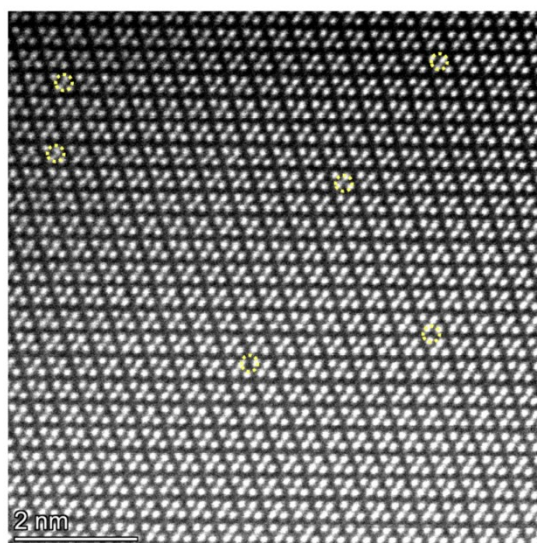

**Fig. S5** AC-HADDF-STEM images of  $\text{Cu}_1/\text{ZrO}_2$ . Dark spots in the yellow circles represent single copper atoms.

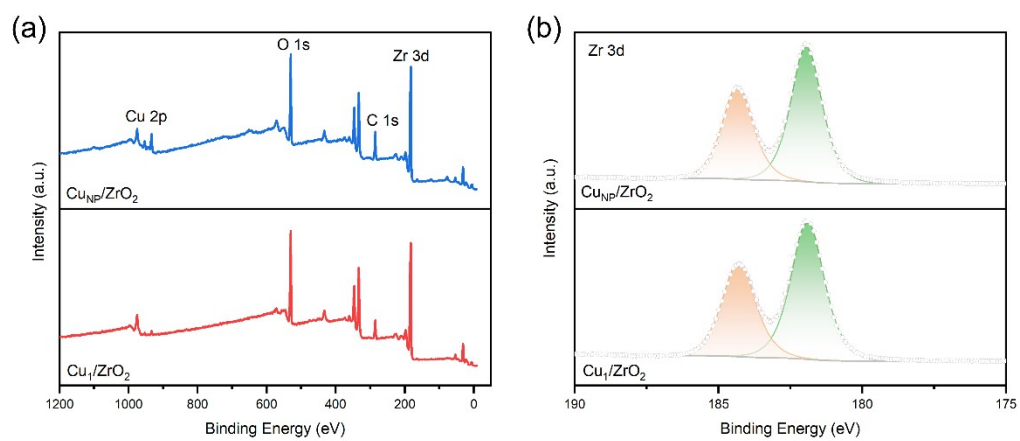

**Fig. S6** XPS survey (a) and Zr 3d (b) spectrum of  $\text{Cu}_1/\text{ZrO}_2$  and  $\text{Cu}_{\text{NP}}/\text{ZrO}_2$ .

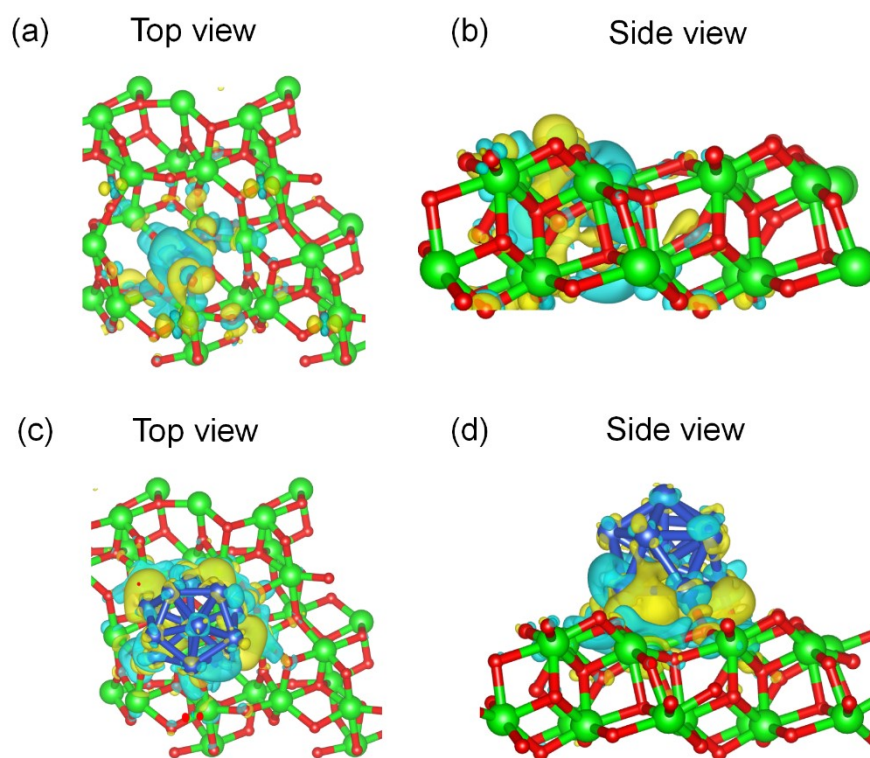

**Fig. S7** The differential charge density map of  $\text{Cu}_1/\text{ZrO}_2$  (a,b) and  $\text{Cu}_{\text{NP}}/\text{ZrO}_2$  (c,d).

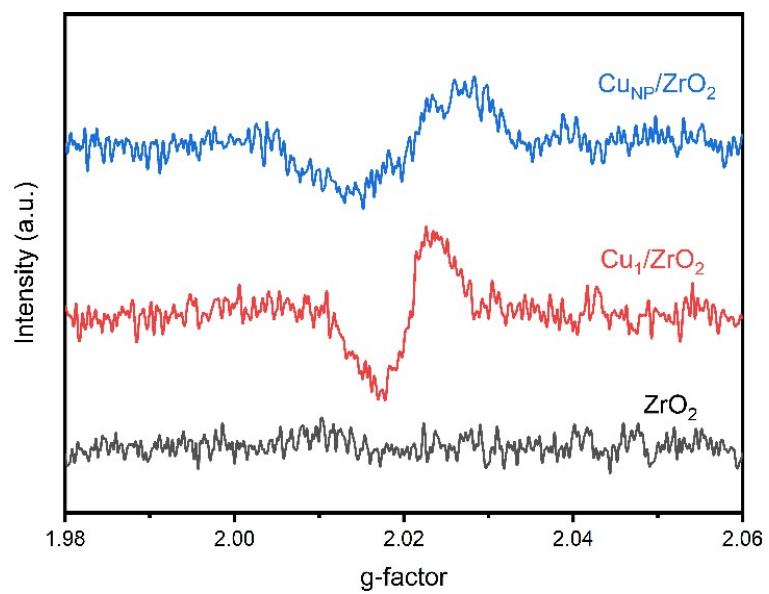

**Fig. S8** The EPR results of  $\text{ZrO}_2$ ,  $\text{Cu}_1/\text{ZrO}_2$  and  $\text{Cu}_{\text{NP}}/\text{ZrO}_2$ .

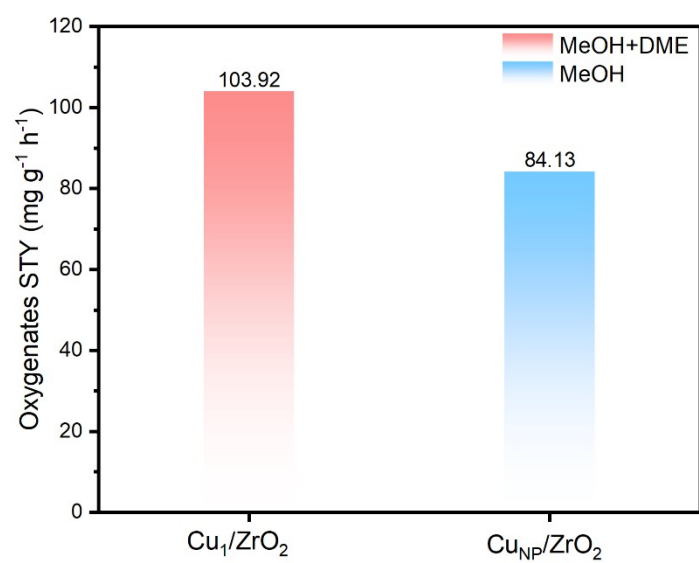

**Fig. S9** Results of CO<sub>2</sub> hydrogenation over Cu<sub>1</sub>/ZrO<sub>2</sub> and Cu<sub>NP</sub>/ZrO<sub>2</sub> catalysts.

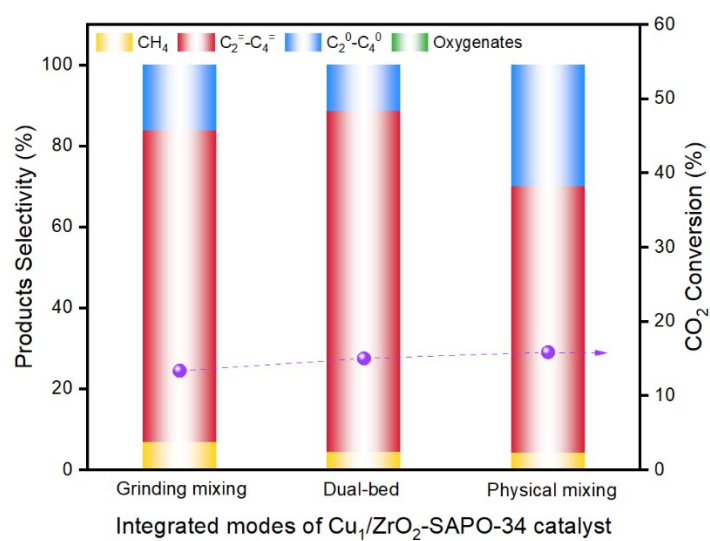

**Fig. S10** Results of CO<sub>2</sub> hydrogenation over Cu<sub>1</sub>/ZrO<sub>2</sub>-SAPO-34 catalysts with different integrated modes (Reaction conditions: 380°C, 3.0 MPa and WHSV = 15000 mL g<sup>-1</sup> h<sup>-1</sup>).

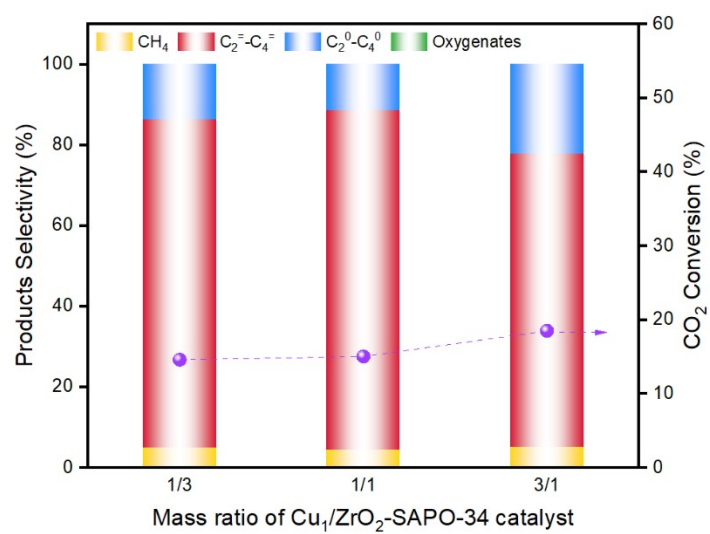

**Fig. S11** Results of CO<sub>2</sub> hydrogenation over Cu<sub>1</sub>/ZrO<sub>2</sub>-SAPO-34 catalysts with different mass ratio (Reaction conditions: 380°C, 3.0 MPa and WHSV = 15000 mL g<sup>-1</sup> h<sup>-1</sup>).

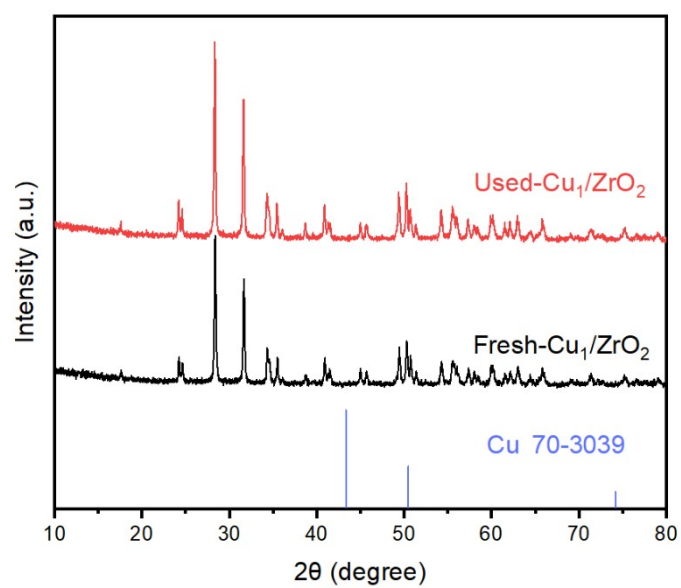

**Fig. S12** XRD patterns of the fresh and used Cu<sub>1</sub>/ZrO<sub>2</sub> catalysts.

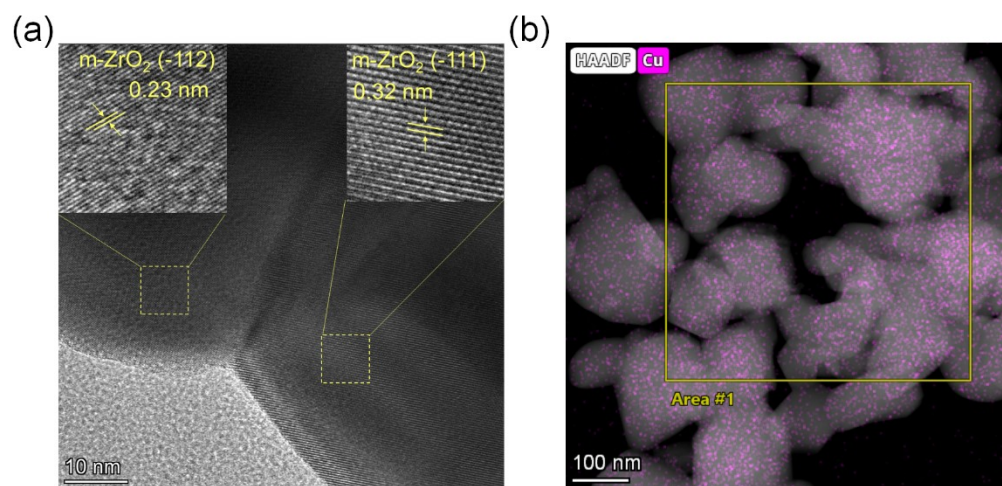

**Fig. S13** HRTEM image (a) and EDS mapping image of Cu element (b) of spent 1.0wt% Cu<sub>1</sub>/ZrO<sub>2</sub>.

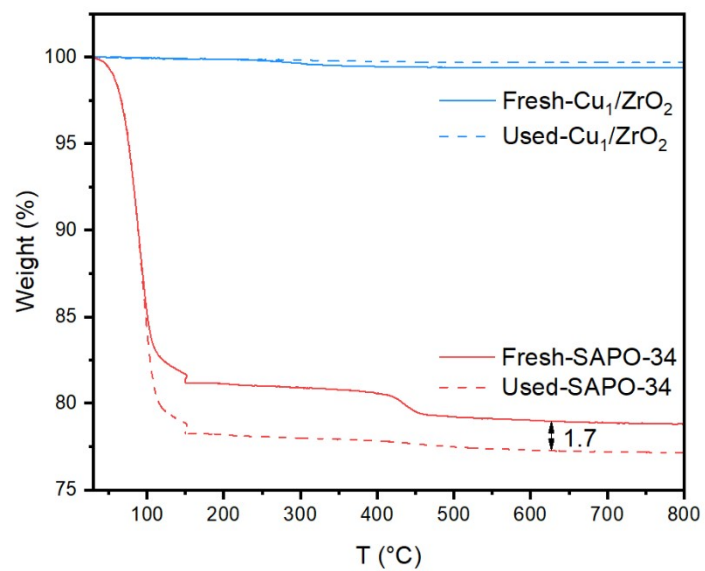

**Fig. S14** TGA of fresh and used Cu<sub>1</sub>/ZrO<sub>2</sub> as well as fresh and used SAPO-34 catalysts.

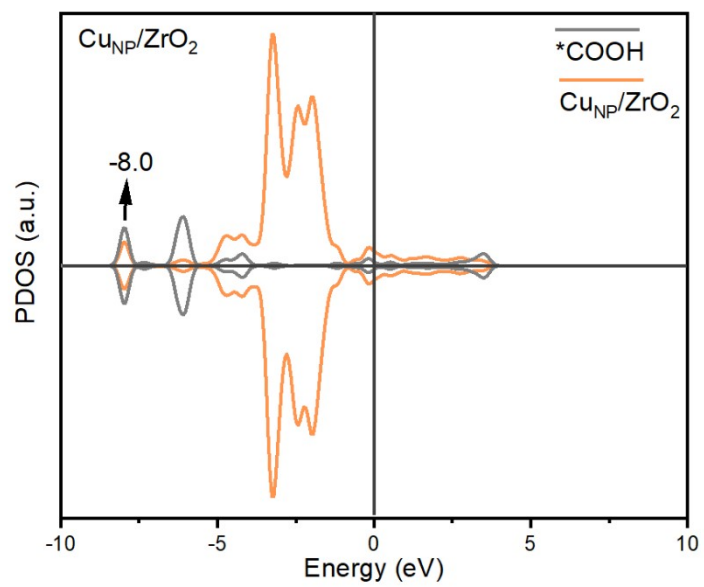

**Fig. S15** DOS of \*COOH adsorbed on Cu<sub>NP</sub>/ZrO<sub>2</sub>.

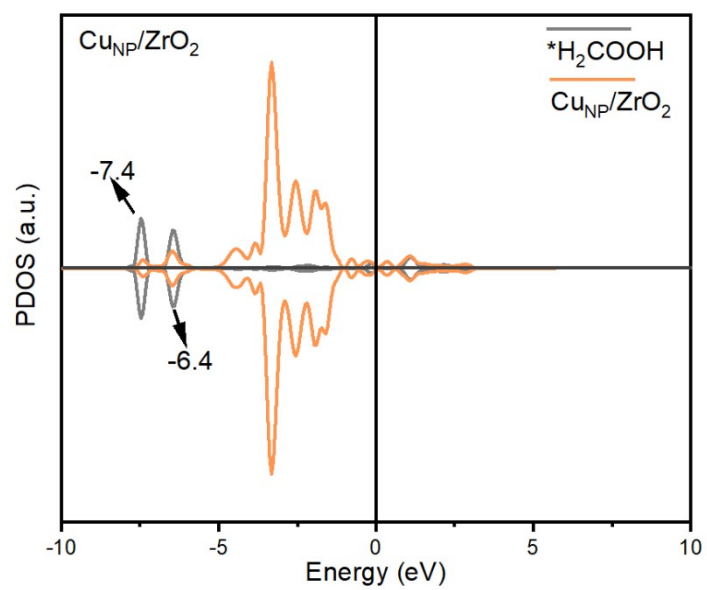

**Fig. S16** DOS of \*CH<sub>3</sub>O adsorbed on Cu<sub>NP</sub>/ZrO<sub>2</sub>.

**Table S1.** Cu content of Cu/ZrO<sub>2</sub> catalyst.

| <b>Sample</b>                            | <b>Theoretical content<br/>(wt%)</b> | <b>Measured content<br/>(wt%)</b> |
|------------------------------------------|--------------------------------------|-----------------------------------|
| 1.0wt% Cu <sub>1</sub> /ZrO <sub>2</sub> | 1.3                                  | 1.1                               |
| Cu <sub>NP</sub> /ZrO <sub>2</sub>       | 1.3                                  | 1.5                               |

**Table S2.** Cu Dispersion of Cu<sub>1</sub>/ZrO<sub>2</sub> and Cu<sub>NP</sub>/ZrO<sub>2</sub> by N<sub>2</sub>O Titration.

| <b>Sample</b>                            | <b>Cu dispersion (%)</b> |
|------------------------------------------|--------------------------|
| 1.0wt% Cu <sub>1</sub> /ZrO <sub>2</sub> | N.D.                     |
| Cu <sub>NP</sub> /ZrO <sub>2</sub>       | 53.8                     |

N.D. represents not detected.

**Table S3.** Carbon balance (exclude carbon deposition) of the 1.0 wt% Cu/ZrO<sub>2</sub>-SAPO-34 catalysts during reaction. Reaction conditions: 380°C, 3.0 MPa and WHSV = 15000 mL g<sup>-1</sup> h<sup>-1</sup>.

| <b>Sample</b>                               | <b>Integrated mode</b> | <b>Total amount of carbon generated (mmol)</b> | <b>Total amount of carbon consumed (mmol)</b> | <b>Carbon balance (%)</b> |
|---------------------------------------------|------------------------|------------------------------------------------|-----------------------------------------------|---------------------------|
| Cu <sub>1</sub> /ZrO <sub>2</sub> -SAPO-34  | Physical mixing        | 0.0300                                         | 0.0319                                        | 94.6                      |
|                                             | Grinding mixing        | 0.0249                                         | 0.0267                                        | 93.4                      |
| Cu <sub>NP</sub> /ZrO <sub>2</sub> -SAPO-34 | Dual-bed               | 0.0286                                         | 0.0300                                        | 95.3                      |
|                                             | Dual-bed               | 0.0439                                         | 0.0466                                        | 94.2                      |
